# Supplementary material for: A rhodamine hydrazide-based fluorescent probe for sensitive and selective detection of hypochlorous acid and its application in living cells
Source: Royal Society of Chemistry journal article supplement (doi:10.1039/c4ay02281e), 2014-10-16
Supplement: c4ay02281e1.pdf [file c4ay02281e1.pdf]

## Supporting Information

### **A rhodamine hydrazide-based fluorescent probe for sensitive and selective detection of hypochlorous acid and its application in living cells**

Zhen Zhang,<sup>\*a</sup> Chengquan Deng,<sup>a</sup> Liesu Meng,<sup>b</sup> Yan Zheng<sup>c</sup> and Xiaomei Yan<sup>c</sup>

<sup>a</sup> Department of Applied Chemistry, School of Science, Xi'an Jiaotong University, Xi'an 710049, China. E-mail: zzlinda@mail.xjtu.edu.cn; Fax: +86 29 82668559; Tel: +86 29 82663914.

<sup>b</sup> Department of Genetics and Molecular Biology, School of Medicine, Xi'an Jiaotong University, Xi'an 710061, China.

<sup>c</sup> Department of Chemical Biology, College of Chemistry and Chemical Engineering, Xiamen University, Xiamen 361005, China.

#### **Contents**

1. UV-vis absorption spectra of probe **RGNH** with different levels of HOCl
2. Effect of the ratio of ethanol to water on the fluorescence response of probe **RGNH** to HOCl
3. Kinetic behavior of the fluorescence intensity changes of probe **RGNH** with HOCl
4. Fluorescence intensity changes of probe **RGNH** with HOCl and other ROS/RNS
5. Color changes of probe **RGNH** with HOCl and other ROS/RNS
6. Analysis of the reaction product between probe **RGNH** and HOCl by high-resolution ESI-MS
7. ESI-MS and <sup>1</sup>H NMR spectra of rhodamine 19, the product isolated from the reaction of probe **RGNH** with HOCl via column chromatography
8. ESI-MS, high-resolution ESI-MS, <sup>1</sup>H NMR, and <sup>13</sup>C NMR spectra of probe **RGNH**
9. Comparison of the recently reported hydrazide-based fluorescent probes for HOCl or OCl<sup>-</sup>

1. UV-vis absorption spectra of probe **RGNH** with different levels of HOCl

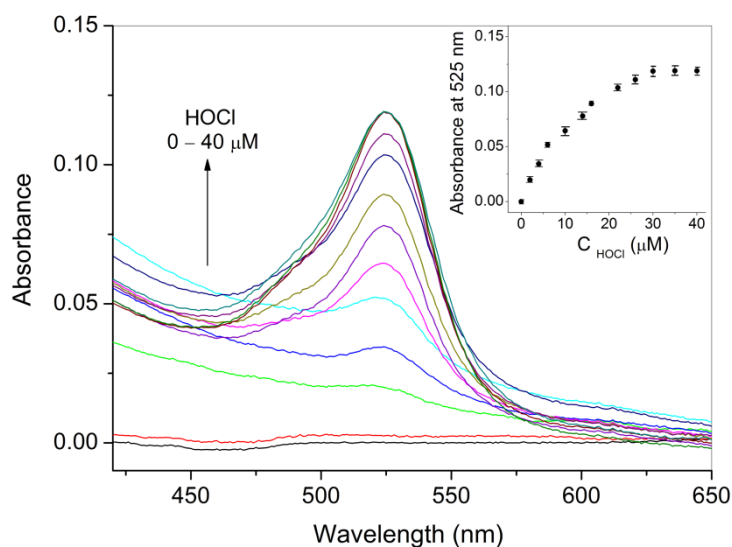

**Fig. S1** UV-vis absorption spectra of probe **RGNH** (10 μM) with different levels of HOCl (bottom to top: 0, 2, 4, 6, 10, 14, 16, 22, 26, 30, 35, 40 μM) in PBS (10 mM, pH 7.4, 1% ethanol, v/v). Inset: Absorbance changes of probe **RGNH** (10 μM) at 525 nm as a function of HOCl concentration.

2. Effect of the ratio of ethanol to water on the fluorescence response of probe **RGNH** to HOCl

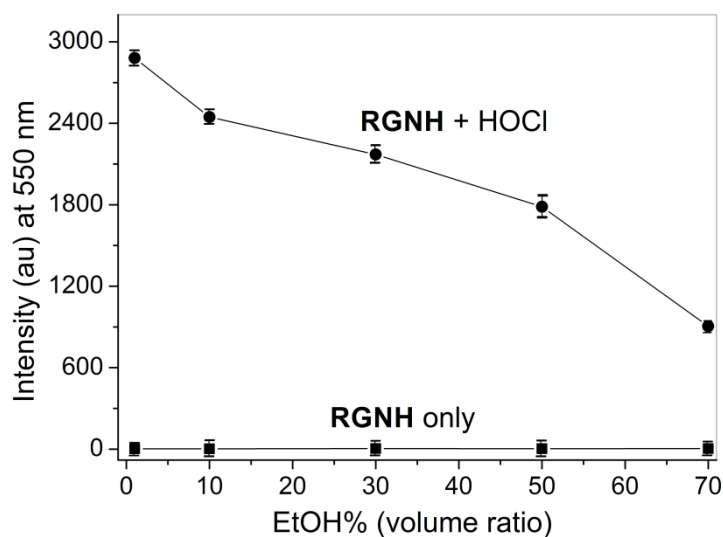

**Fig. S2** Effect of the ratio of ethanol to water on the fluorescence intensity (550 nm) of probe **RGNH** (10 μM) in the absence and presence of HOCl (20 μM) in PBS (10 mM, pH 7.4).  $\lambda_{\text{ex}} = 500 \text{ nm}$ .

3. Kinetic behavior of the fluorescence intensity changes of probe **RGNH** with HOCl

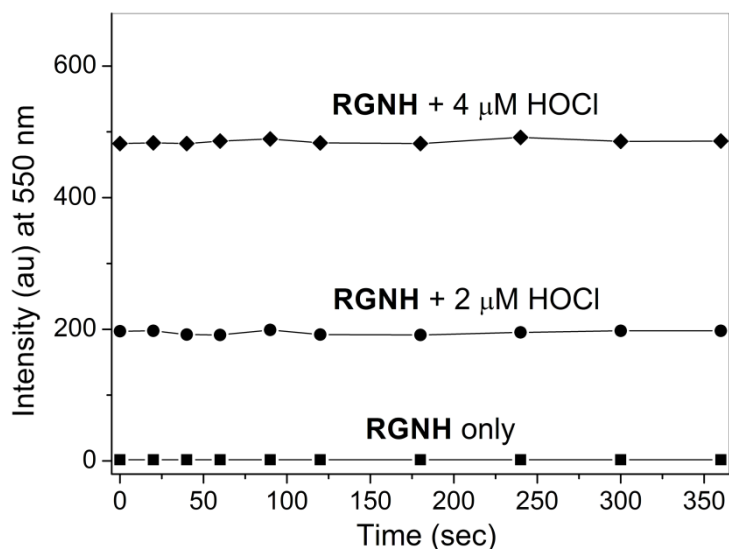

**Fig. S3** Kinetic behavior of the fluorescence intensity changes (550 nm) of probe **RGNH** (10 μM) in the absence and presence of HOCl (2, or 4 μM) in PBS (10 mM, pH 7.4, 1% ethanol, v/v).  $\lambda_{\text{ex}} = 500$  nm.

4. Fluorescence intensity changes of probe **RGNH** with HOCl and other ROS/RNS

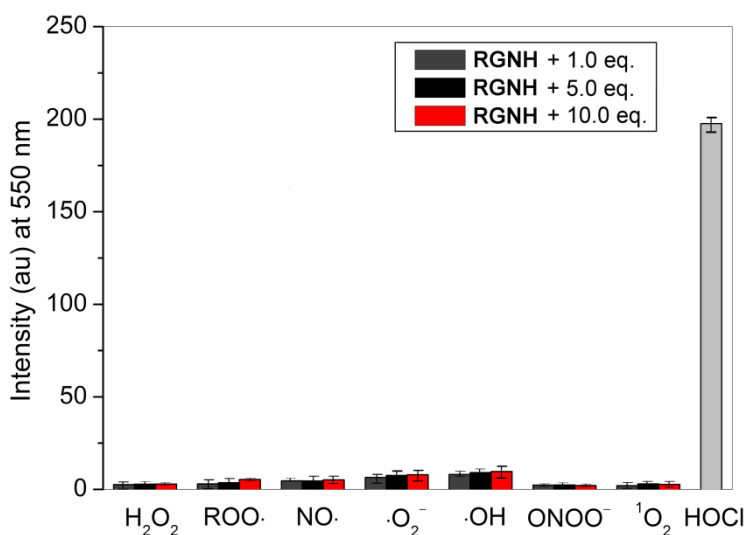

**Fig. S4** Fluorescence intensity changes (550 nm) of probe **RGNH** (10 μM) upon addition of HOCl (2 μM) or other ROS/RNS (10, 50, 100 μM) in PBS (10 mM, pH 7.4, 1% ethanol, v/v).  $\lambda_{\text{ex}} = 500$  nm.

## 5. Color changes of probe **RGNH** with HOCl and other ROS/RNS

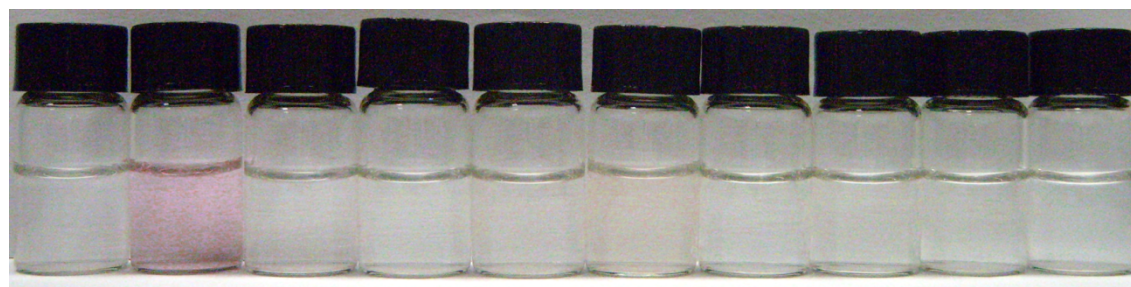

RGNH only   HOCl   H<sub>2</sub>O<sub>2</sub>   ROO<sup>·</sup>   NO<sup>·</sup>   ·OH   ·O<sub>2</sub><sup>-</sup>   ONOO<sup>-</sup>   <sup>1</sup>O<sub>2</sub><sup>-</sup>   HOCl + L-methionine

**Fig. S5** Color changes of probe **RGNH** (10 μM) upon addition of HOCl (20 μM), other ROS/RNS (100 μM), or HOCl (20 μM) plus L-methionine (200 μM).

## 6. Analysis of the reaction product between probe **RGNH** and HOCl by high-resolution ESI-MS

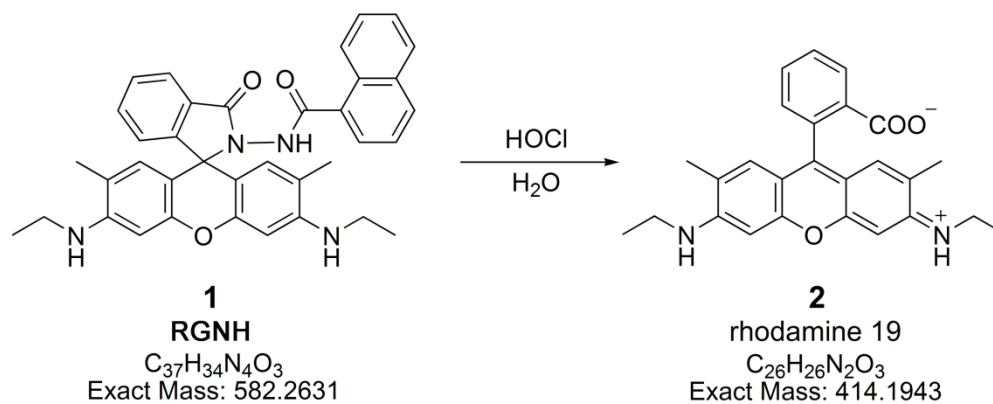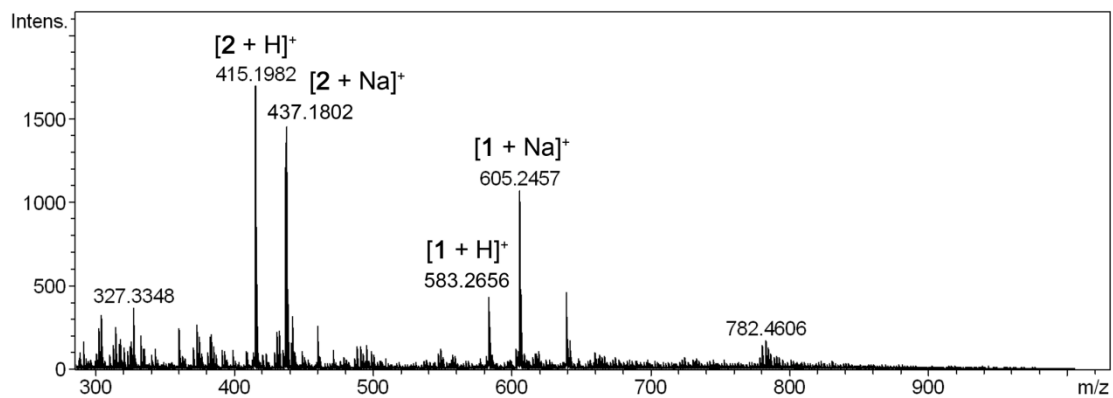

**Fig. S6** High-resolution ESI-MS spectrum of probe **RGNH** in the presence of HOCl.

7. ESI-MS and  $^1\text{H}$  NMR spectra of rhodamine 19, the product isolated from the reaction of probe **RGNH** with HOCl via column chromatography

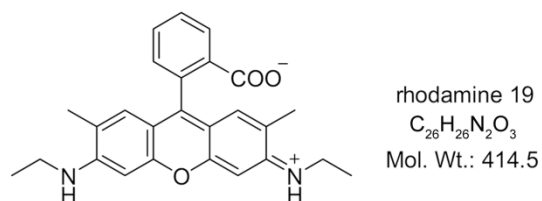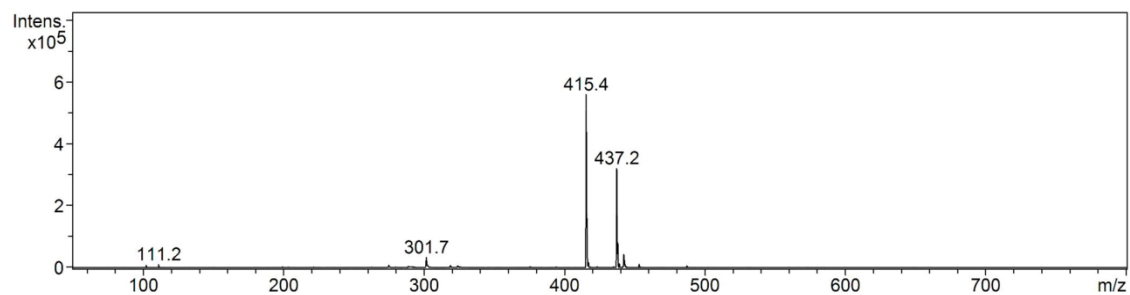

**Fig. S7** ESI-MS spectrum of rhodamine 19.

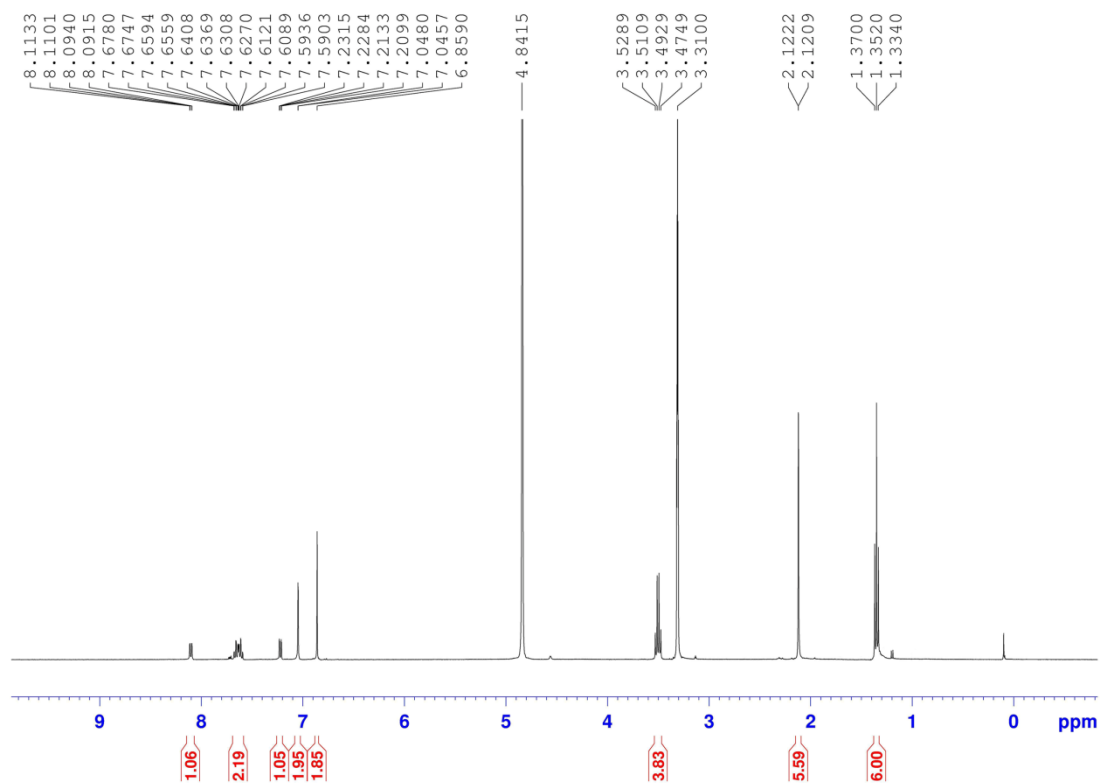

**Fig. S8**  $^1\text{H}$  NMR spectrum of rhodamine 19.

8. ESI-MS, high-resolution ESI-MS,  $^1\text{H}$  NMR, and  $^{13}\text{C}$  NMR spectra of probe **RGNH**

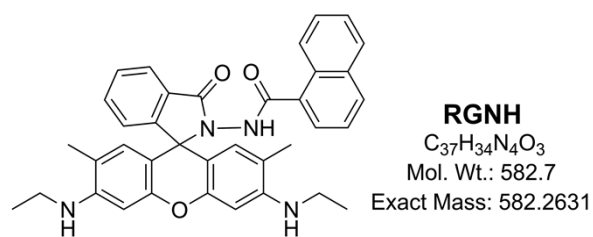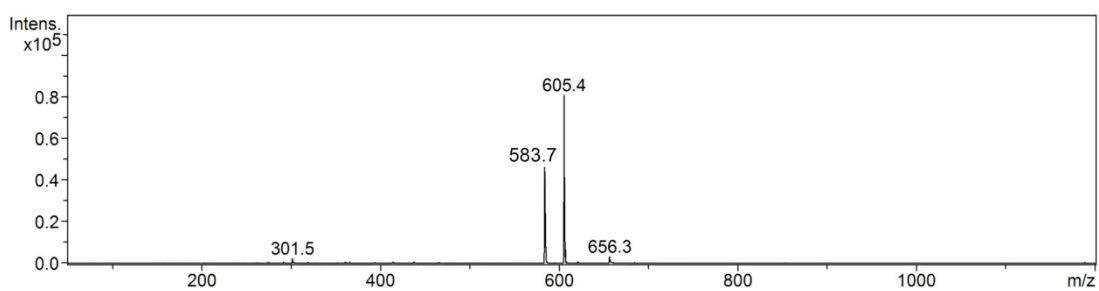

**Fig. S9** ESI-MS spectrum of **RGNH**.

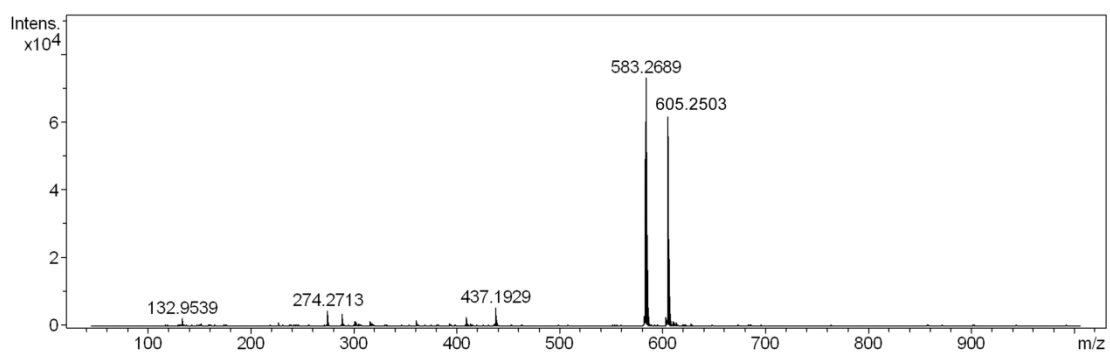

**Fig. S10** High-resolution ESI-MS spectrum of **RGNH**.

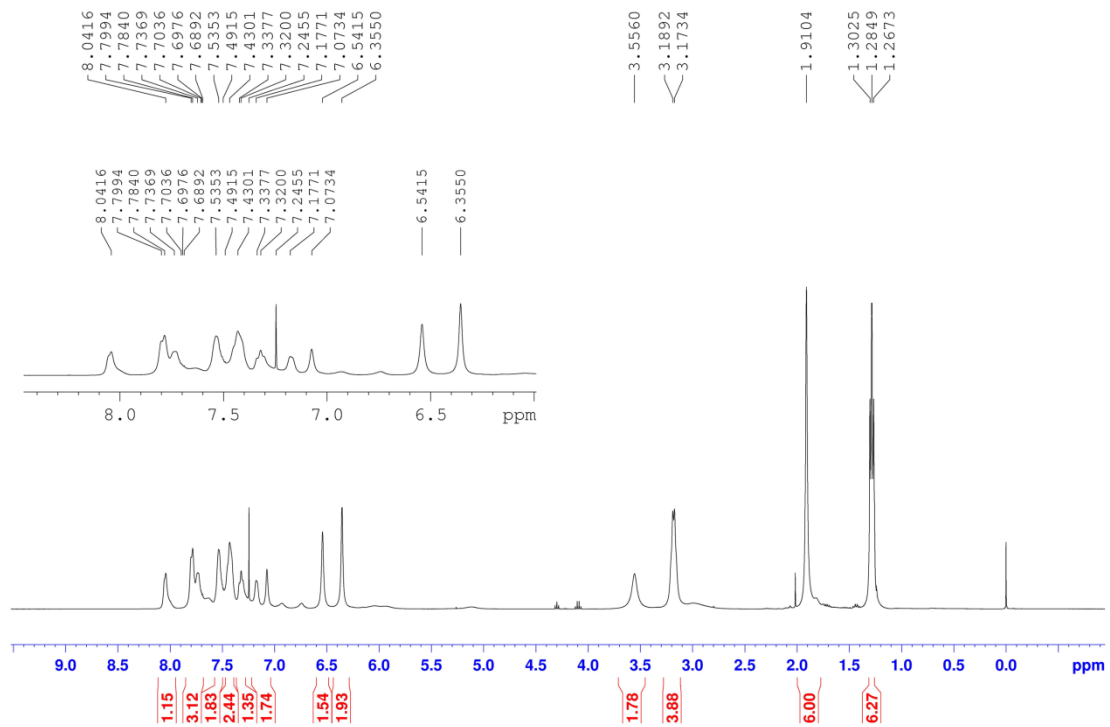

Fig. S11  $^1\text{H}$  NMR spectrum of RGNH.

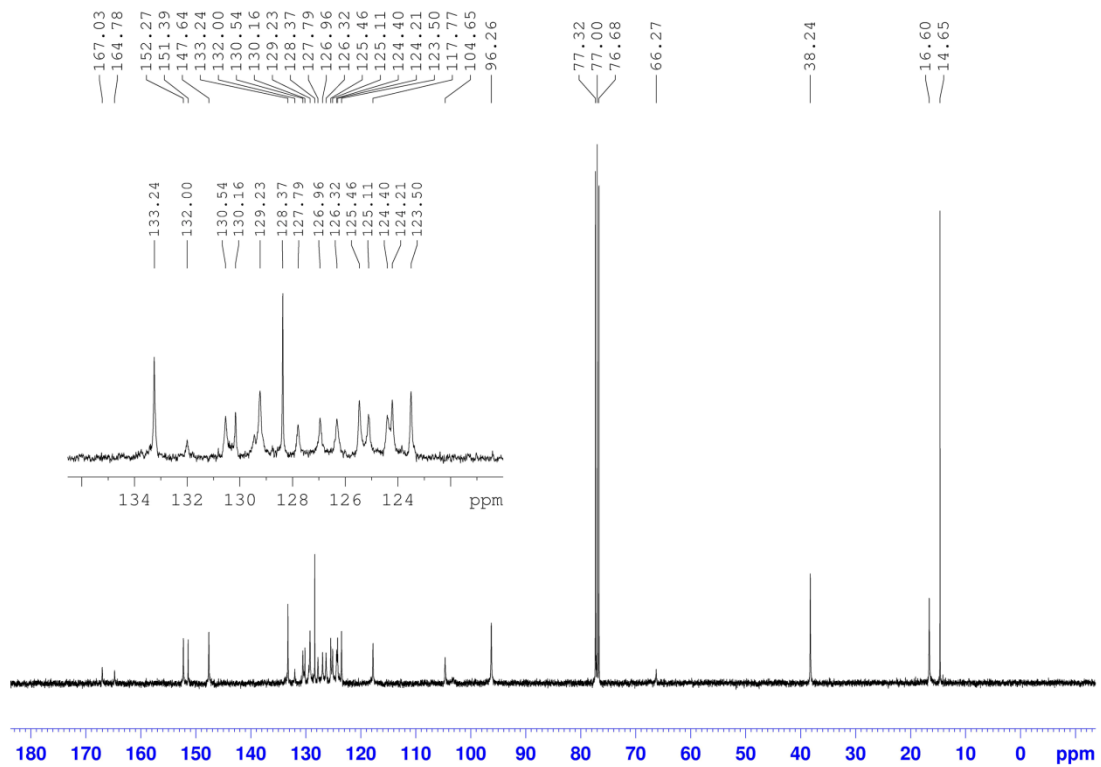

Fig. S12  $^{13}\text{C}$  NMR spectrum of RGNH.

9. Comparison of the recently reported hydrazone-based fluorescent probes for HOCl or OCl<sup>-</sup>

**Table S1.** Comparison of the recently reported hydrazone-based fluorescent probes for HOCl or OCl<sup>-</sup>.

| Probe                                                                                                                                    | Response time    | Detection limit | pH span of detection | Comments                                                                                                                                                                |
|------------------------------------------------------------------------------------------------------------------------------------------|------------------|-----------------|----------------------|-------------------------------------------------------------------------------------------------------------------------------------------------------------------------|
| 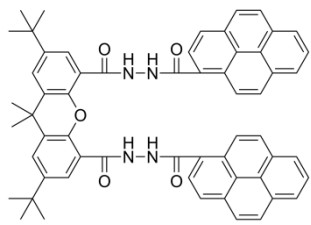 <p><i>Anal. Methods</i>, 2014, <b>6</b>, 609</p>       | 30 min           | 0.35 μM         | 5–9                  | HEPES buffer (pH 7.4) containing 50% (v/v) ethanol<br>I <sub>375</sub> /I <sub>495</sub> = 152 fold<br>Ratiometric fluorescent probe                                    |
|  <p><i>Anal. Chim. Acta</i>, 2013, <b>775</b>, 100</p> | within 1 min     | 0.024 μM        | 7.5–11               | PBS buffer (pH 8.5) containing 40% (v/v) DMF<br>I <sub>578</sub> /I <sub>501</sub> = 3955 fold<br>Ratiometric fluorescent probe                                         |
|  <p><i>Anal. Methods</i>, 2012, <b>4</b>, 616</p>     | more than 60 min | 5.0 nM          | 6–11.3               | water<br>Fluorescent turn-on response<br>I <sub>548</sub> = over 82 fold<br>10 equiv Cu <sup>2+</sup> and Hg <sup>2+</sup> induced around 10-fold enhancement at 548 nm |
|  <p><i>Anal. Methods</i>, 2012, <b>4</b>, 4334</p>    | within 2 min     | 0.33 μM         | no data available    | PBS buffer (pH 7.4) with less than 1% ethanol<br>Fluorescent turn-on response<br>I <sub>528</sub> = 156 fold<br>Hg <sup>2+</sup> induced 80-fold enhancement at 530 nm  |



| Probe                                                                                                                                    | Response time                                                  | Detection limit    | pH span of detection | Comments                                                                                                                                                                                                                                                                                                                                                                                                                                                        |
|------------------------------------------------------------------------------------------------------------------------------------------|----------------------------------------------------------------|--------------------|----------------------|-----------------------------------------------------------------------------------------------------------------------------------------------------------------------------------------------------------------------------------------------------------------------------------------------------------------------------------------------------------------------------------------------------------------------------------------------------------------|
| 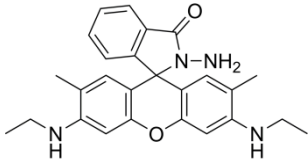 <p><i>Talanta</i>, 2011, <b>85</b>, 779</p>            | 10 min                                                         | 0.06 $\mu\text{M}$ | 4.5–8                | <p>HEPES buffer (pH 7.4) containing 1% (v/v) DMF</p> <p>Fluorescent turn-on response</p> <p><math>I_{550} = 270</math> fold</p> <p><math>\text{Cu}^{2+}</math> induced 100-fold enhancement at 550 nm</p> <p>Proton (especially under acid conditions, pH &lt; 6) induced great enhancement at 550 nm</p> <p>Imaging both exogenous and endogenous HOCl in living cells</p> <p>Low cytotoxicity when probe concentration below 100 <math>\mu\text{M}</math></p> |
|  <p><i>Org. Biomol. Chem.</i>, 2011, <b>9</b>, 432</p> | 10 s                                                           | $\sim 1.0$ nM      | 4–13                 | <p><math>\text{Na}_2\text{B}_4\text{O}_7/\text{NaOH}</math> buffer (pH 12.0) containing 70% (v/v) methanol</p> <p>Fluorescent turn-on response</p> <p><math>I_{580} &gt; 420</math> fold</p>                                                                                                                                                                                                                                                                    |
|  <p><i>Chem. Eur. J.</i>, 2008, <b>14</b>, 4719</p>   | 30 min                                                         | 27 nM              | 9.2–12.7             | <p><math>\text{Na}_2\text{B}_4\text{O}_7/\text{NaOH}</math> buffer (pH 12.0) containing 30% (v/v) THF</p> <p>Fluorescent turn-on response centered at 578 nm</p>                                                                                                                                                                                                                                                                                                |
|  <p><i>This work</i>, <b>RGNH</b></p>                 | completed immediately after the sample solutions were prepared | 3.3 nM             | 5–14                 | <p>PBS buffer (pH 7.4) with 1% (v/v) ethanol</p> <p>Fluorescent turn-on response</p> <p><math>I_{550} = 1890</math> fold</p> <p>Imaging both exogenous and endogenous HOCl in living cells</p> <p>Flow cytometry analysis of endogenous HOCl in living cells</p> <p>Low cytotoxicity when probe concentration below 100 <math>\mu\text{M}</math></p>                                                                                                            |
